# Supplementary material for: Non-invasive prediction of the tumor growth rate using advanced diffusion models in head and neck squamous cell carcinoma patients
Source: PubMed Central journal article supplement (PMC5464896; doi:10.18632/oncotarget.16851), 2017-04-05
Supplement: oncotarget-08-33631-s001.pdf [file oncotarget-08-33631-s001.pdf]

## Non-invasive prediction of the tumor growth rate using advanced diffusion models in head and neck squamous cell carcinoma patients

### Supplementary Materials

**Supplementary Table 1: Details of signal to noise ratio (SNR) in all b-value images**

| b-value | SNR         |
|---------|-------------|
| 0       | 94.4 ± 32.2 |
| 10      | 87.5 ± 28.7 |
| 20      | 88.3 ± 30.1 |
| 30      | 84.5 ± 27.6 |
| 50      | 82.1 ± 27.1 |
| 80      | 74.5 ± 26.8 |
| 100     | 70.6 ± 27.3 |
| 200     | 75.2 ± 24.7 |
| 400     | 68.3 ± 23.5 |
| 800     | 53.5 ± 20.7 |
| 1000    | 58.2 ± 20.4 |
| 2000    | 45.4 ± 15.2 |

Data are mean ± standard deviation. SNR: signal to noise ratio (dimensionless).

**Supplementary Table 2: The result of five-fold cross validation analysis**

|          | training set ( <i>n</i> = 44)                                                                   |                                 | test set ( <i>n</i> = 11) |                         |      |
|----------|-------------------------------------------------------------------------------------------------|---------------------------------|---------------------------|-------------------------|------|
|          | Univariate significant parameters                                                               | Final output parameters         | Correlation coefficient   | Correlation coefficient | ICC  |
| 1st fold | ADC, D, D <sub>k</sub> , DDC, D <sub>2</sub> , D <sub>3</sub> , f <sub>2</sub> , f <sub>3</sub> | D <sub>2</sub> , D <sub>3</sub> | 0.74                      | 0.7                     | 0.69 |
| 2nd fold | ADC, D, D <sub>k</sub> , DDC, D <sub>2</sub> , D <sub>3</sub> , f <sub>3</sub>                  | D <sub>2</sub> , D <sub>3</sub> | 0.76                      | 0.69                    | 0.66 |
| 3rd fold | ADC, D, D <sub>k</sub> , DDC, D <sub>2</sub> , D <sub>3</sub> , f <sub>2</sub> , f <sub>3</sub> | DDC, D <sub>3</sub>             | 0.71                      | 0.63                    | 0.61 |
| 4th fold | ADC, D, D <sub>k</sub> , DDC, D <sub>2</sub> , D <sub>3</sub> , f <sub>2</sub> , f <sub>3</sub> | D <sub>2</sub> , D <sub>3</sub> | 0.72                      | 0.66                    | 0.64 |
| 5th fold | ADC, D, D <sub>k</sub> , DDC, D <sub>2</sub> , D <sub>3</sub> , f <sub>3</sub>                  | D <sub>2</sub> , D <sub>3</sub> | 0.77                      | 0.72                    | 0.68 |
| Average  |                                                                                                 |                                 | 0.74                      | 0.68                    | 0.66 |

ICC: intraclass correlation coefficient. Abbreviations in 'Univariate significant parameters' are explained in the Table 2 footnote.
